# Supplementary material for: Synthesis of new graphene oxide/TiO2 and TiO2/SiO2 nanocomposites and their evaluation as photocatalysts
Source: Royal Society of Chemistry journal article supplement (doi:10.1039/d3cy00461a), 2023-01-01
Supplement: d3cy00461a1.pdf [file d3cy00461a1.pdf]

## Electronic Supplementary Information

### Synthesis of new graphene oxide/TiO<sub>2</sub> and TiO<sub>2</sub>/SiO<sub>2</sub> nanocomposites and their evaluation as photocatalysts

Marta Rosenthal<sup>a,c</sup>, Timur Biktagirov<sup>b</sup>, Wolf Gero Schmidt<sup>b</sup>, René Wilhelm<sup>c\*</sup>

<sup>a</sup>Department of Chemistry, University of Paderborn, Warburger Str. 100, 33098 Paderborn, Germany.

<sup>b</sup>Department of Physics, University of Paderborn, Warburger Str. 100, 33098 Paderborn, Germany.

<sup>c</sup>Institute of Organic Chemistry, Clausthal University of Technology, Leibnizstr. Str. 6, 38678 Clausthal-Zellerfeld, Germany. E-Mail: rene.wilhelm@tu-clausthal.de

#### Table of Content:

|                  |              |
|------------------|--------------|
| <b>Scheme S1</b> | <b>p. S2</b> |
| <b>Scheme S2</b> | <b>p. S2</b> |
| <b>Scheme S3</b> | <b>p. S3</b> |
| <b>Scheme S4</b> | <b>p. S3</b> |
| <b>Scheme S5</b> | <b>p. S4</b> |

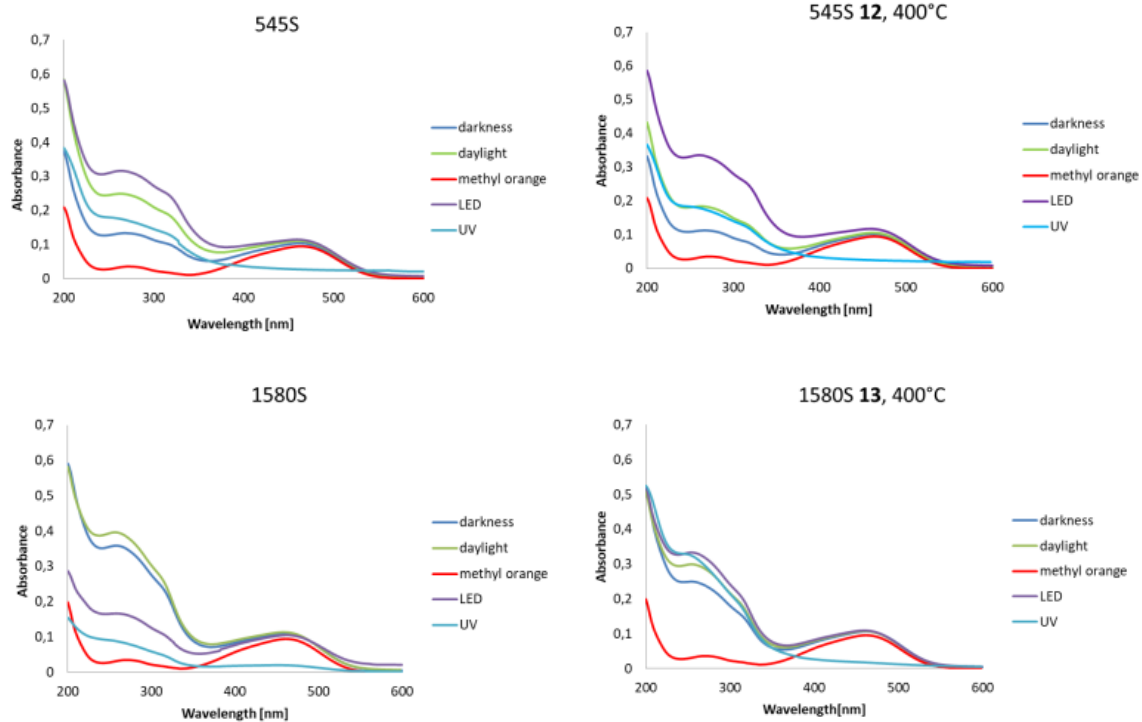

**Scheme S1.** UV-vis spectra of MO and pure titanium dioxides 545S and 1580S with and without heat treatment after 30 min irradiation.

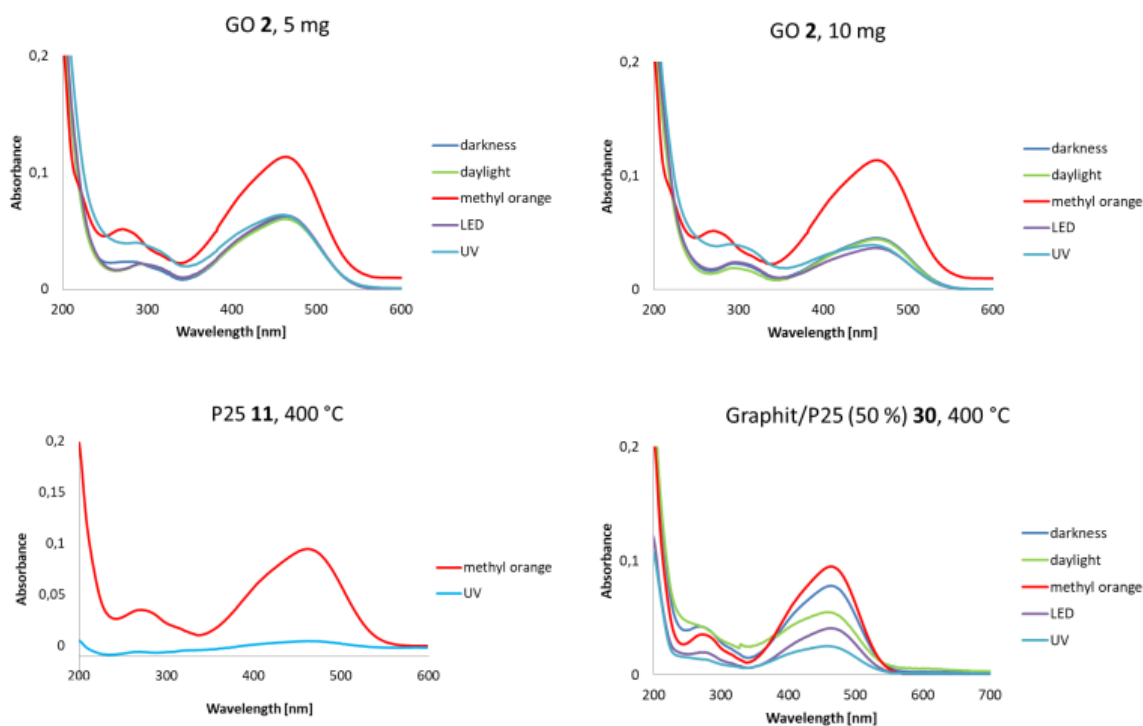

**Scheme S2.** UV-vis spectra of the materials used and the mass dependency.

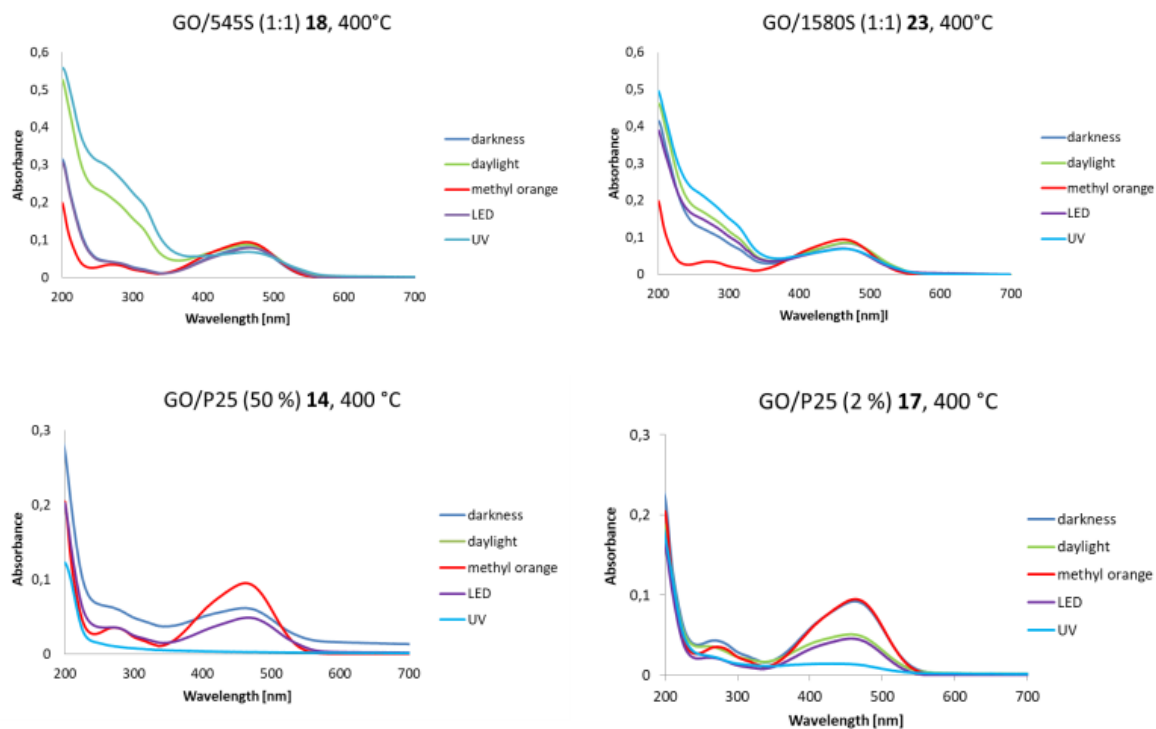

**Scheme S3.** UV-vis spectra of different composites based on graphene oxide and the mass dependency (UV-vis of **14**: daylight and LED overlap).

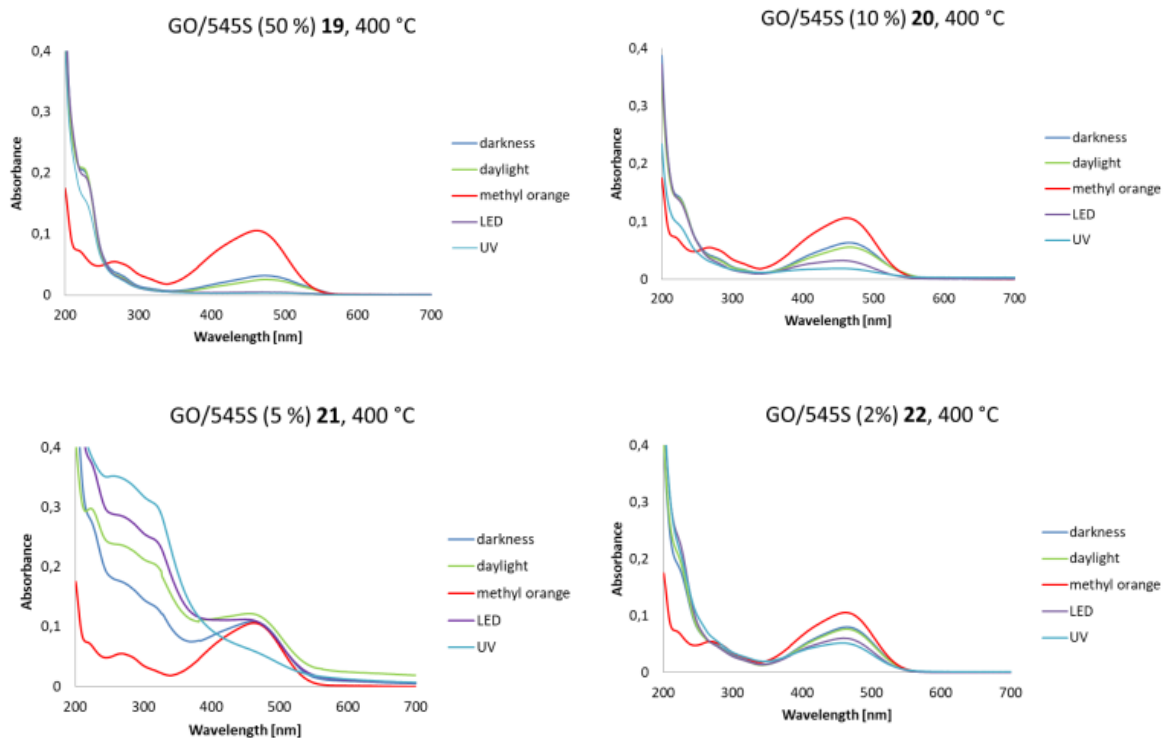

**Scheme S4.** UV-vis spectra of different composites based on graphene oxide and 545S (P25+ 5 wt.-% SiO<sub>2</sub>) and the mass dependency (UV-vis of **19**: LED and UV overlap).

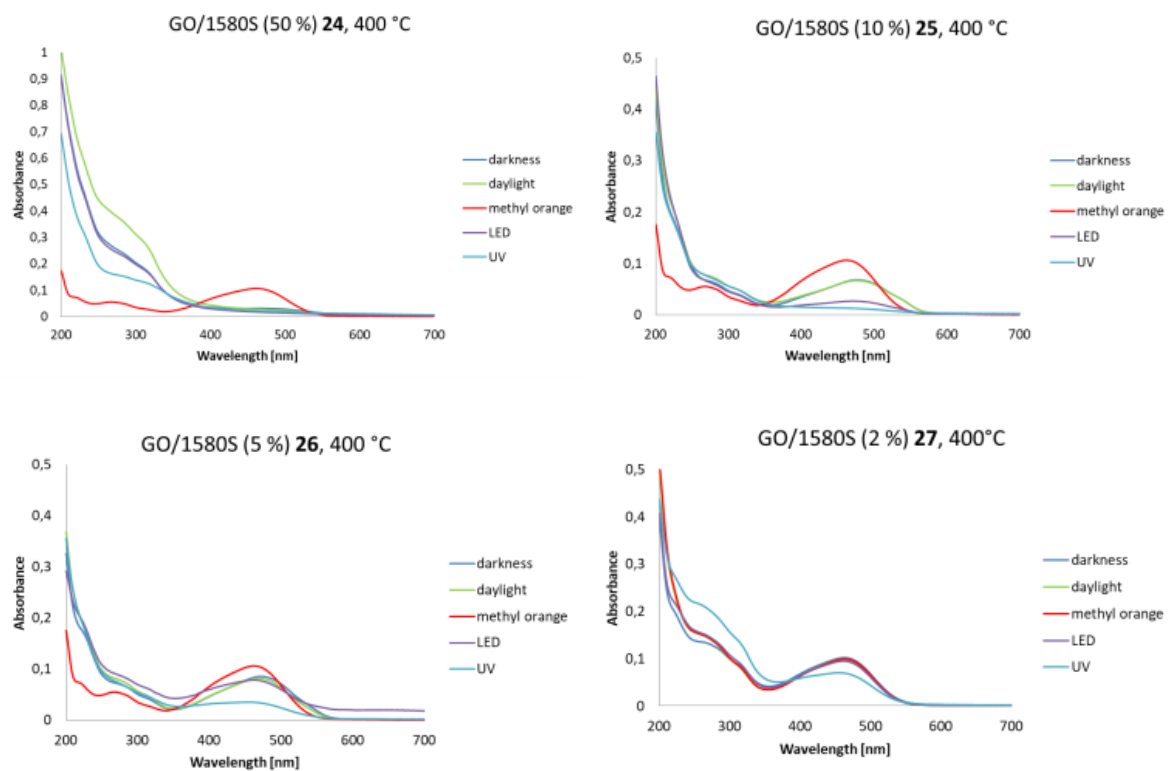

**Scheme S5.** UV-vis spectra of different composites based on graphene oxide and 1580S (P25+ 15 wt.-% SiO<sub>2</sub>) and the mass dependency.
